CORRECTION

# Correction: Evidence of Online Performance Deterioration in User Sessions on Reddit

The *PLOS ONE* Staff

The following information is missing from the Funding section: This work was partly funded by the Army Research Office contract W911NF-15-1-0142. The publisher apologizes for the error.

## Reference

1. Singer P, Ferrara E, Kooti F, Strohmaier M, Lerman K (2016) Evidence of Online Performance Deterioration in User Sessions on Reddit. PLoS ONE 11(8): e0161636. doi: [10.1371/journal.pone.0161636](https://doi.org/10.1371/journal.pone.0161636) PMID: [27560185](https://pubmed.ncbi.nlm.nih.gov/27560185/)

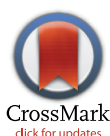

## OPEN ACCESS

**Citation:** The *PLOS ONE* Staff (2016) Correction: Evidence of Online Performance Deterioration in User Sessions on Reddit. PLoS ONE 11(10): e0165852. doi:[10.1371/journal.pone.0165852](https://doi.org/10.1371/journal.pone.0165852)

**Published:** October 27, 2016

**Copyright:** © 2016 The PLOS ONE Staff. This is an open access article distributed under the terms of the [Creative Commons Attribution License](https://creativecommons.org/licenses/by/4.0/), which permits unrestricted use, distribution, and reproduction in any medium, provided the original author and source are credited.
